# Supplementary material for: Fine-Scale Crossover Rate Variation on the Caenorhabditis elegans X Chromosome
Source: PubMed Central journal article supplement (PMC4889672; doi:10.1534/g3.116.028001), 2016-04-15
Supplement: supp_g3.116.028001_FigureS2.pdf [file supp_g3.116.028001_FigureS2.pdf]

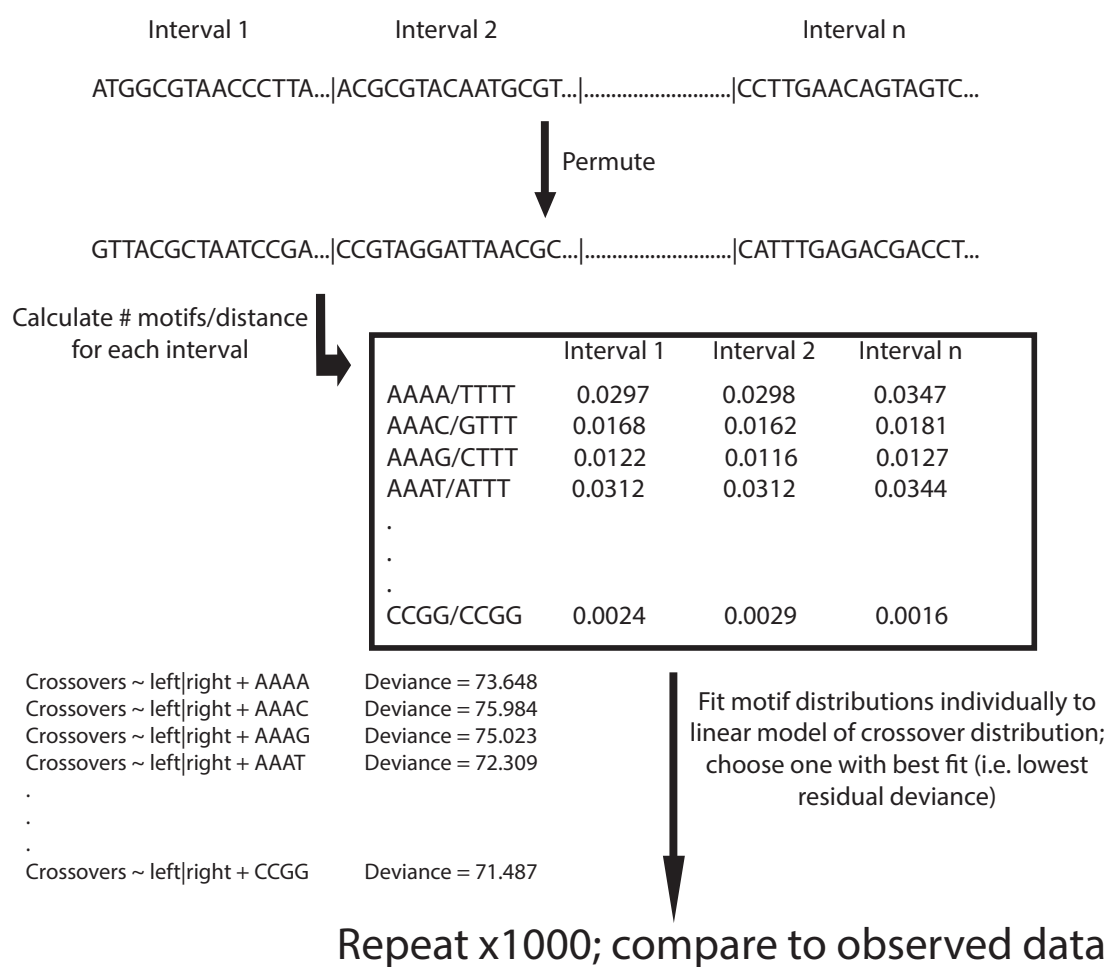

**Figure S2:** Small sequence motif permutation test pipeline.
