# Supplementary material for: Fine-Scale Crossover Rate Variation on the Caenorhabditis elegans X Chromosome
Source: PubMed Central journal article supplement (PMC4889672; doi:10.1534/g3.116.028001), 2016-04-15
Supplement: supp_g3.116.028001_TableS1.pdf [file supp_g3.116.028001_TableS1.pdf]

**Table S1: Data from modENCODE**

| Mark           | Track                             | DCCid          |
|----------------|-----------------------------------|----------------|
| H3K4me1        | AB8895_H3K4ME1733246_N2_EEMB      | modENCODE_2726 |
| H3K4me2        | WA30834809_H3K4ME2_N2_EEMB        | modENCODE_3198 |
| H3K4me3        | WA30534819_H3K4ME3_N2_EEMB        | modENCODE_3197 |
| H3K9me1        | AB9045_H3K9ME1291918_N2_EEMB      | modENCODE_2646 |
| H3K9me2        | HK00008_H3K9ME26D11_N2_EEMB       | modENCODE_2444 |
| H3K9me3        | AB8898_H3K9ME3339901_N2_EEMB      | modENCODE_2339 |
| H3K27ac        | AB4729_H3K27AC361571_N2_EEMB      | modENCODE_2740 |
| H3K27me1       | UP07448_H3K27ME124439_N2_EEMB     | modENCODE_3179 |
| H3K27me3       | HK00013_H3K27ME3:1E7_N2_EEMB      | modENCODE_3171 |
| H3K36me1       | AB9048_H3K36ME1206009_N2_EEMB     | modENCODE_2604 |
| H3K36me2       | AB9049_H3K36ME2608457_N2_EEMB     | modENCODE_2338 |
| H3K36me3       | HK00001_H3K36ME3_13C9_N2_EEMB_s1  | modENCODE_3553 |
| H3K79me2       | AB3594_H3K79ME2346021_N2_EEMB     | modENCODE_2442 |
| H3K79me3       | AB2621_H3K79ME3361576_N2_EEMB     | modENCODE_2443 |
| H4K8ac         | AB15823_H4K8AC487128_N2_EEMB      | modENCODE_3181 |
| H4K16ac        | MP07329_H4K16ACDAM1612187_N2_EEMB | modENCODE_3182 |
| H4K20me1       | DISN147_H4K20ME1_001_N2_EEMB      | modENCODE_3434 |
| IgG            | AB46540_NIGG_N2_MXEMB             | modENCODE_3153 |
| LEM2           | SDQ3891_LEM2_N2_MXEMB             | modENCODE_2729 |
| Mononucleosome | Mononucleosomes_N2_MXEMB          | modENCODE_2763 |
