# Supplementary material for: Fine-Scale Crossover Rate Variation on the Caenorhabditis elegans X Chromosome
Source: PubMed Central journal article supplement (PMC4889672; doi:10.1534/g3.116.028001), 2016-04-15
Supplement: supp_g3.116.028001_TableS2.pdf [file supp_g3.116.028001_TableS2.pdf]

**Table S2: Association of histone modifications with crossover distribution**

| <b>Modification</b> | <b>Coefficient</b> | <b>Deviance Explained</b> | <b>p</b>     |
|---------------------|--------------------|---------------------------|--------------|
| H3K4me1             | -0.21              | 3.4%                      | 0.113        |
| H3K4me2             | -0.13              | 4.7%                      | 0.064        |
| H3K4me3             | -0.22              | 7.6%                      | <b>0.019</b> |
| H3K9me1             | -0.38              | 14.6%                     | <b>0.001</b> |
| H3K9me2             | -0.58              | 14.9%                     | <b>0.001</b> |
| H3K9me3             | -0.20              | 2.0%                      | 0.229        |
| H3K27ac             | -0.16              | 4.5%                      | 0.070        |
| H3K27me1            | -0.16              | 11.0%                     | <b>0.005</b> |
| H3K27me3            | 0.18               | 0.7%                      | 0.467        |
| H3K36me1            | -0.38              | 12.4%                     | <b>0.003</b> |
| H3K36me2            | -0.27              | 14.3%                     | <b>0.002</b> |
| H3K36me3            | -0.31              | 9.4%                      | <b>0.011</b> |
| H3K79me2            | -0.18              | 11.7%                     | <b>0.004</b> |
| H3K79me3            | -0.18              | 12.8%                     | <b>0.003</b> |
| H4K8ac              | -0.05              | 0.1%                      | 0.770        |
| H4K16ac             | -0.19              | 3.7%                      | 0.102        |
| H4K20me1            | -0.29              | 10.4%                     | <b>0.007</b> |
